# Supplementary material
Source: publisher figshare collection journal article supplement (https://gsajournals.figshare.com/ndownloader/files/24560903)
Supplement: Supplementary file 1 [file 24560903]

## Sheet: Sheet1
Element: WntA2
H. erato scaffold	Hit start	Hit end	H. melpomene scaffold	Hit start	Hit end	evalue	bit score	Hit to H. erato element from Van Belleghem et al (2017)?
Herato1001	4709353	4709923	Hmel2.10004	1860034	1860608	8.99e-126	449	Ly
Herato1001	4707170	4707387	Hmel2.10004	1858008	1858224	5.65e-93	340	Ly
Herato1001	4706405	4706636	Hmel2.10004	1857245	1857468	4.46e-79	294	Ly
Herato1001	4710094	4710317	Hmel2.10004	1860691	1860912	5.89e-63	241	NA
Herato1001	4708345	4708552	Hmel2.10004	1859322	1859515	4.65e-49	195	NA
Element: WntA1
Herato1001	4657014	4657501	Hmel2.10004	1820669	1821160	0	695	St
Herato1001	4665476	4665518	Hmel2.10004	1821200	1821242	2.47e-11	69.4	NA
Herato1001	4660715	4660749	Hmel2.10004	1821242	1821208	6.91e-07	54.7	NA
Element: Ray2
heliconius_erato_demophoon_v1_core_32_85_1__scaffold__Herato1801	1371055	1371664	heliconius_melpomene_melpomene_hmel2_core_32_85_1__scaffold__Hmel218003	781528	782126	5.17e-179	628	R
heliconius_erato_demophoon_v1_core_32_85_1__scaffold__Herato1801	1372612	1373654	heliconius_melpomene_melpomene_hmel2_core_32_85_1__scaffold__Hmel218003	782499	783528	0	950	R
heliconius_erato_demophoon_v1_core_32_85_1__scaffold__Herato1801	1377180	1377455	heliconius_melpomene_melpomene_hmel2_core_32_85_1__scaffold__Hmel218003	787542	787814	2.65e-107	390	R
heliconius_erato_demophoon_v1_core_32_85_1__scaffold__Herato1801	1384516	1384691	heliconius_melpomene_melpomene_hmel2_core_32_85_1__scaffold__Hmel218003	788085	788268	4.97e-25	117	NA
heliconius_erato_demophoon_v1_core_32_85_1__scaffold__Herato1801	1378746	1378999	heliconius_melpomene_melpomene_hmel2_core_32_85_1__scaffold__Hmel218003	788576	788830	1.6e-104	381	NA
heliconius_erato_demophoon_v1_core_32_85_1__scaffold__Herato1801	1384735	1385049	heliconius_melpomene_melpomene_hmel2_core_32_85_1__scaffold__Hmel218003	791679	791998	7.59e-88	326	NA
heliconius_erato_demophoon_v1_core_32_85_1__scaffold__Herato1801	1385847	1386085	heliconius_melpomene_melpomene_hmel2_core_32_85_1__scaffold__Hmel218003	792663	792886	6.57e-09	63.9	NA
heliconius_erato_demophoon_v1_core_32_85_1__scaffold__Herato1801	1387645	1388163	heliconius_melpomene_melpomene_hmel2_core_32_85_1__scaffold__Hmel218003	795388	795896	2.46e-162	573	NA
heliconius_erato_demophoon_v1_core_32_85_1__scaffold__Herato1801	1388977	1389258	heliconius_melpomene_melpomene_hmel2_core_32_85_1__scaffold__Hmel218003	796359	796651	3.61e-71	270	NA
heliconius_erato_demophoon_v1_core_32_85_1__scaffold__Herato1801	1389442	1389713	heliconius_melpomene_melpomene_hmel2_core_32_85_1__scaffold__Hmel218003	796797	797070	4.44e-105	383	Y
heliconius_erato_demophoon_v1_core_32_85_1__scaffold__Herato1801	1390556	1390819	heliconius_melpomene_melpomene_hmel2_core_32_85_1__scaffold__Hmel218003	799488	799749	7.54e-93	342	Y
heliconius_erato_demophoon_v1_core_32_85_1__scaffold__Herato1801	1391672	1392897	heliconius_melpomene_melpomene_hmel2_core_32_85_1__scaffold__Hmel218003	800278	801537	0	1260	Y
heliconius_erato_demophoon_v1_core_32_85_1__scaffold__Herato1801	1362781	1362867	heliconius_melpomene_melpomene_hmel2_core_32_85_1__scaffold__Hmel218003	800861	800948	5.01e-20	100	Y
heliconius_erato_demophoon_v1_core_32_85_1__scaffold__Herato1801	1393728	1393992	heliconius_melpomene_melpomene_hmel2_core_32_85_1__scaffold__Hmel218003	802387	802647	1.62e-94	348	Y
heliconius_erato_demophoon_v1_core_32_85_1__scaffold__Herato1801	1395012	1395040	heliconius_melpomene_melpomene_hmel2_core_32_85_1__scaffold__Hmel218003	802679	802707	3.96e-06	54.7	NA
heliconius_erato_demophoon_v1_core_32_85_1__scaffold__Herato1801	1395315	1395837	heliconius_melpomene_melpomene_hmel2_core_32_85_1__scaffold__Hmel218003	802922	803435	6.88e-158	558	NA
Element: Ray1
heliconius_erato_demophoon_v1_core_32_85_1__scaffold__Herato1801	1365573	1366609	heliconius_melpomene_melpomene_hmel2_core_32_85_1__scaffold__Hmel218003	778372	779400	0	1478	NA
heliconius_erato_demophoon_v1_core_32_85_1__scaffold__Herato1801	1359557	1359899	heliconius_melpomene_melpomene_hmel2_core_32_85_1__scaffold__Hmel218003	773351	773697	2.55e-132	472	NA
heliconius_erato_demophoon_v1_core_32_85_1__scaffold__Herato1801	1360510	1360814	heliconius_melpomene_melpomene_hmel2_core_32_85_1__scaffold__Hmel218003	773888	774199	2.17e-63	243	NA
heliconius_erato_demophoon_v1_core_32_85_1__scaffold__Herato1801	1361039	1361749	heliconius_melpomene_melpomene_hmel2_core_32_85_1__scaffold__Hmel218003	774430	775143	3.39e-111	401	NA
heliconius_erato_demophoon_v1_core_32_85_1__scaffold__Herato1801	1362004	1362276	heliconius_melpomene_melpomene_hmel2_core_32_85_1__scaffold__Hmel218003	775894	776174	1.61e-94	346	NA
heliconius_erato_demophoon_v1_core_32_85_1__scaffold__Herato1801	4804633	4804708	heliconius_melpomene_melpomene_hmel2_core_32_85_1__scaffold__Hmel218003	776305	776376	2.33e-13	76.8	NA
heliconius_erato_demophoon_v1_core_32_85_1__scaffold__Herato1801	2459962	2460025	heliconius_melpomene_melpomene_hmel2_core_32_85_1__scaffold__Hmel218003	776380	776321	5.05e-10	65.8	NA
heliconius_erato_demophoon_v1_core_32_85_1__scaffold__Herato1801	1362871	1363022	heliconius_melpomene_melpomene_hmel2_core_32_85_1__scaffold__Hmel218003	776519	776669	3.74e-41	169	NA
heliconius_erato_demophoon_v1_core_32_85_1__scaffold__Herato1801	4920699	4920796	heliconius_melpomene_melpomene_hmel2_core_32_85_1__scaffold__Hmel218003	776735	776833	5.01e-15	82.4	NA
heliconius_erato_demophoon_v1_core_32_85_1__scaffold__Herato1801	1363797	1364335	heliconius_melpomene_melpomene_hmel2_core_32_85_1__scaffold__Hmel218003	777097	777651	4.38e-110	398	NA
Element: Dennis2
heliconius_erato_demophoon_v1_core_32_85_1__scaffold__Herato1801	1412032	1412454	heliconius_melpomene_melpomene_hmel2_core_32_85_1__scaffold__Hmel218003	817102	817524	1.19e-152	538	D
heliconius_erato_demophoon_v1_core_32_85_1__scaffold__Herato1801	1412820	1413102	heliconius_melpomene_melpomene_hmel2_core_32_85_1__scaffold__Hmel218003	817607	817888	2.73e-109	394	D
heliconius_erato_demophoon_v1_core_32_85_1__scaffold__Herato1801	1414126	1414393	heliconius_melpomene_melpomene_hmel2_core_32_85_1__scaffold__Hmel218003	818243	818518	4.67e-92	337	NA
heliconius_erato_demophoon_v1_core_32_85_1__scaffold__Herato1801	1414919	1415371	heliconius_melpomene_melpomene_hmel2_core_32_85_1__scaffold__Hmel218003	819178	819633	7.07e-160	562	NA
Element: Dennis1
NO HITS
Element: Optix Band
NO HITS
